# Supplementary material
Source: Springer Nature journal article supplement (https://www.springermedizin.de/resource/supplementary/13584_2013_105_MOESM2_ESM.pdf/9677072)

**a** Sensitivity to ECV (no spinal) success rate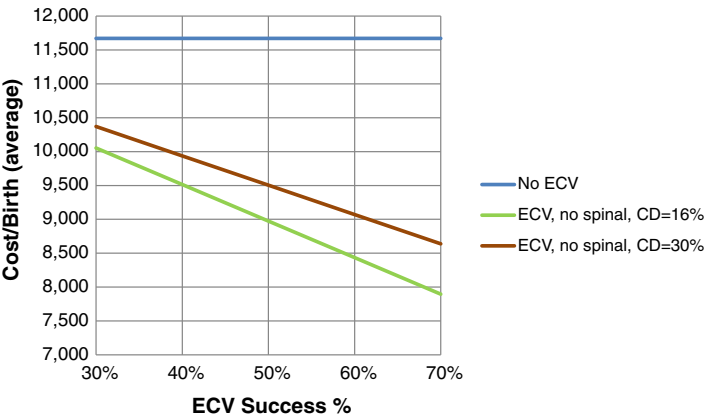**b** Sensitivity to ECV with spinal success rate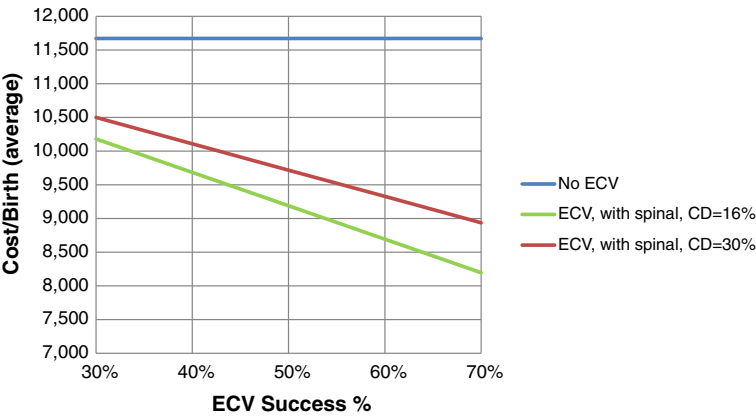

Supplement: MOESM2 [file 9677072]
